# Supplementary material for: d-Alanyl-d-Alanine Ligase as a Broad-Host-Range Counterselection Marker in Vancomycin-Resistant Lactic Acid Bacteria
Source: PubMed Central journal article supplement (PMC5996685; doi:10.1128/jb.00607-17), 2018-06-11
Supplement: JB.00607-17_zjb999094789s1.pdf [file JB.00607-17_zjb999094789s1.pdf]

Supplementary Table S1: Bacterial strains and plasmids used in this study

| Bacteria and Plasmids                                   | Characteristics†                                                                                                                                                                                  | Source/Reference       |
|---------------------------------------------------------|---------------------------------------------------------------------------------------------------------------------------------------------------------------------------------------------------|------------------------|
| <b>Bacteria</b>                                         |                                                                                                                                                                                                   |                        |
| <i>E. coli</i> EC1000                                   | Derivative of <i>E. coli</i> MC1000 in which <i>repA</i> is integrated in chromosome                                                                                                              | (1)                    |
| <i>L. reuteri</i> ATCC PTA 6475                         | Human breast milk isolate                                                                                                                                                                         | BioGaia AB             |
| VPL4073                                                 | In-frame deletion of 2 kb <i>pduCDE</i> in <i>L. reuteri</i> 6475                                                                                                                                 | This work              |
| <i>L. reuteri</i> R2lc                                  | Rat gastrointestinal isolate                                                                                                                                                                      | (2)                    |
| VPL4192                                                 | In-frame deletion of 870 bp <i>araT</i> in <i>L. reuteri</i> R2lc                                                                                                                                 | This work              |
| <i>L. reuteri</i> DSM 17938                             | Plasmid-cured derivative of <i>L. reuteri</i> ATCC 55730                                                                                                                                          | BioGaia AB, (3)        |
| VPL3565                                                 | <i>L. reuteri</i> DSM 17938 harboring pVE6007                                                                                                                                                     | This work              |
| VPL4171                                                 | In-frame deletion of 2.2 kb <i>sdpA</i> in <i>L. reuteri</i> DSM 17938                                                                                                                            | This work              |
| VPL4176                                                 | In-frame deletion of 5.3 kb <i>sdpB</i> in <i>L. reuteri</i> DSM 17938                                                                                                                            | This work              |
| <i>L. rhamnosus</i> GG                                  | Human fecal isolate                                                                                                                                                                               | ATCC                   |
| VPL4185                                                 | In-frame deletion of 1.5 kb <i>acs1</i> in <i>L. rhamnosus</i> GG                                                                                                                                 | This work              |
| <i>L. casei</i> BFLM218                                 | Human fecal isolate                                                                                                                                                                               | (4)                    |
| VPL4013                                                 | Insertion of 66 bp 3x-FLAG tag <i>prtP</i> gene in <i>L. casei</i> BFLM218                                                                                                                        | This work              |
| <i>L. brevis</i> ATCC 8287                              | Fermented olives isolate                                                                                                                                                                          | ATCC                   |
| VPL3978                                                 | <i>L. brevis</i> harboring pVPL3933                                                                                                                                                               | This work              |
| <i>L. fermentum</i> ATCC 14931                          | Fermented beets isolate                                                                                                                                                                           | ATCC                   |
| VPL3950                                                 | <i>L. fermentum</i> harboring pVPL3933                                                                                                                                                            | This work              |
| <i>L. plantarum</i> ATCC BAA-793                        | Human saliva isolate                                                                                                                                                                              | ATCC                   |
| VPL3938                                                 | <i>L. plantarum</i> harboring pVPL3933                                                                                                                                                            | This work              |
| <i>L. salivarius</i> CCUG 47825                         | Human blood isolate                                                                                                                                                                               | CCUG                   |
| VPL3941                                                 | <i>L. salivarius</i> harboring pVPL3933                                                                                                                                                           | This work              |
| <i>L. sakei</i> ATCC 15521                              | Starter of sake                                                                                                                                                                                   | ATCC                   |
| VPL3952                                                 | <i>L. sakei</i> harboring pVPL3933                                                                                                                                                                | This work              |
| <i>L. gasseri</i> ATCC 33323                            | Human intestinal isolate                                                                                                                                                                          | ATCC                   |
| <i>Fructobacillus fructosus</i> DSM 20349               | Flowers isolate                                                                                                                                                                                   | DSMZ                   |
| <i>Leuconostoc mesenteroides</i> DSM 20346              | Hansen's dried starter powder                                                                                                                                                                     | DSMZ                   |
| <i>Pediococcus acidilactici</i> DSM 20284               | Barley isolate                                                                                                                                                                                    | DSMZ                   |
| <i>Weissella paramesenteroides</i> DSM 20288            | Meat isolate                                                                                                                                                                                      | DSMZ                   |
| <i>Lactococcus lactis</i> subsp. <i>cremoris</i> NZ9000 | Dairy starter, derivative of MG1363, <i>pepN::nisRK</i>                                                                                                                                           | (5)                    |
| <b>Plasmids</b>                                         |                                                                                                                                                                                                   |                        |
| pOR119                                                  | Em <sup>R</sup> , <i>repA</i> -                                                                                                                                                                   | (6)                    |
| pSIP411                                                 | Em <sup>R</sup> , Sakacin-P based expression vector                                                                                                                                               | (7)                    |
| pVPL2042                                                | Em <sup>R</sup> , pNZ8048 derivative. Cm marker was replaced by Em marker                                                                                                                         | Van Pijkeren Lab stock |
| pVPL3002                                                | pOR119 harboring <i>L. reuteri</i> derived <i>ddlF258Y</i>                                                                                                                                        | This work              |
| pVPL3010                                                | Em <sup>R</sup> , derivative of vector pVPL3002 in which the <i>L. rhamnosus</i> GG $\Delta$ <i>acs1</i> deletion cassette was cloned in the MCS site                                             | This work              |
| pVPL3125                                                | Em <sup>R</sup> , derivative of vector pVPL3002 in which 2kb 5'- and 3' flanking sequence required for 3x-FLAG tag insertion in <i>prtP</i> of <i>L. casei</i> BFLM218 was cloned in the MCS site | This work              |
| pVPL3137                                                | Em <sup>R</sup> , derivative of pVPL3125 in which protein encodes 3x-FLAG tag was cloned in between the integration cassette of pVPL3125                                                          | This work              |
| pVPL3478                                                | Em <sup>R</sup> , derivative of vector pVPL3002 in which the <i>L. reuteri</i> 6475 <i>pduCDE</i> deletion cassette was cloned in the MCS site                                                    | This work              |
| pVPL3612                                                | Em <sup>R</sup> , derivative of vector pVPL3002 in which the <i>L. reuteri</i> 17938 <i>sdpA</i> deletion cassette was cloned in the MCS site                                                     | This work              |
| pVPL3694                                                | Em <sup>R</sup> , derivative of vector pVPL3002 in which the <i>L. reuteri</i> R2lc <i>araT</i> deletion cassette was cloned in the MCS site                                                      | This work              |
| pVPL3762                                                | Em <sup>R</sup> , derivative of vector pVPL3002 in which the <i>L. reuteri</i> 17938 <i>sdpB</i> deletion cassette was cloned in the MCS site                                                     | This work              |
| pVPL3859                                                | Em <sup>R</sup> , derivative of vector 2042 in which the <i>L. plantarum</i> BAA-793 <i>ddl</i> was inserted in the MSC site                                                                      | This work              |
| pVPL3862                                                | Em <sup>R</sup> , derivative of pVPL2042 in which <i>ddlF258Y</i> was cloned in the backbone of pVPL2042                                                                                          | This work              |

| Plasmid  | Characteristics†                                                                                                                                      | Source/Reference |
|----------|-------------------------------------------------------------------------------------------------------------------------------------------------------|------------------|
| pVPL3925 | Em <sup>R</sup> , derivative of vector 2042 in which the <i>L. plantarum</i> BAA-793 <i>ddlF260Y</i> was inserted in the MSC site                     | This work        |
| pVPL3933 | Em <sup>R</sup> , derivative of pSIP411 in which <i>ddlF260Y<sub>plantarum</sub></i> was cloned under the control of sakacin-based inducible promoter | This work        |

VPL: Van Pijkeren Lab strain identification number. pVPL: Van Pijkeren Lab plasmid identification number.

†: *pduCDE*: glycerol dehydratase large subunit PduC, glycerol dehydratase medium subunit PduD, glycerol dehydratase small subunit PduE (BAG26151, BAG26150.1, BAG26149.1); *araT*: aromatic amino acid aminotransferase (MG822655); *sdpA*: bifunctional phosphodiesterase (WP\_003672341.1); *sdpB*: hypothetical protein and LPXTG-motif cell wall anchor domain protein (WP\_013923860.1 , AEI56985.1); *acs1*: acyl-CoA synthetase (WP\_014570113.1); Em<sup>R</sup>: erythromycin-resistant; Cm<sup>R</sup>: chloramphenicol resistant. The accession number listed can be found on <https://www.ncbi.nlm.nih.gov>. \*: ATCC: American Type Culture Collection; DSMZ: German Collection of Microorganisms and Cell Cultures; CCUG: Culture Collection University of Gothenburg.

**Table S2. Oligonucleotides used in this study**

| oligo name | sequence (5'-3')†                                                                                                                              | Target/comment#                                                                                                                                     |
|------------|------------------------------------------------------------------------------------------------------------------------------------------------|-----------------------------------------------------------------------------------------------------------------------------------------------------|
| oVPL46     | /5phos/aggaaatgcatattcgaactggag                                                                                                                | Fwd, amplifies <i>ddlF258Y</i> of <i>L. reuteri</i> 6475 including native promoter region                                                           |
| oVPL47     | /5phos/acattgtactcacaacatcctaacc                                                                                                               | Rev, amplifies <i>ddlF258Y</i> of <i>L. reuteri</i> 6475                                                                                            |
| oVPL48     | tatccgctcacaattccacac                                                                                                                          | Fwd, amplified the backbone of pORI19                                                                                                               |
| oVPL49     | acaattcacacaggaacacgc                                                                                                                          | Rev, amplified the backbone of pORI19                                                                                                               |
| oVPL52     | tcggaattctgattcactcacacgcatgg                                                                                                                  | Fwd, 3' u/s flanking region of <i>L. rhamnosus</i> GG                                                                                               |
| oVPL53     | cagtcgtaactacgctcttctgctcattgattcaggactc                                                                                                       | Rev, 3' u/s flanking region of <i>L. rhamnosus</i> GG                                                                                               |
| oVPL54     | agtcctgaatcatgagcaagaagcgaagttacgactg                                                                                                          | Fwd, 5' u/s flanking region of <i>L. rhamnosus</i> GG                                                                                               |
| oVPL55     | agctctagaaagcgtccttacacgcagatc                                                                                                                 | Rev, 5' u/s flanking region of <i>L. rhamnosus</i> GG                                                                                               |
| oVPL88     | catggtagtgccctctataattta                                                                                                                       | Rev, starting at ATG of NcoI site of pNZ8048                                                                                                        |
| oVPL89     | tagttctagagagctcaagcttcc                                                                                                                       | Fwd, starting at 4bp upstream of XbaI site of pNZ8048                                                                                               |
| oVPL94     | agatctagcttataactatactgacaatag                                                                                                                 | Fwd, for pVPL3862 screening                                                                                                                         |
| oVPL146    | tctatccaactggctcaagg                                                                                                                           | Internal oligo for d/s SCO screening of pVPL3010 chromosomal integration                                                                            |
| oVPL147    | actggaagatccgccaatac                                                                                                                           | Internal oligo for u/s SCO screening of pVPL3010 chromosomal integration                                                                            |
| oVPL169    | ggtttcccagtcacgagctgtaaaacgacggccagtgaaattcgagctcagcgtccttacacgcagatccctg                                                                      | Gibson oligo, combined with oVPL170 for overlap extension PCR to construct <i>acs1</i> deletion cassette                                            |
| oVPL170    | tcgaaatgcatcttctcacaattcacacaggaacagctatgacctgagattcacttcacacgcatgggc                                                                          | Gibson oligo, combined with oVPL169 for overlap extension PCR to construct <i>acs1</i> deletion cassette                                            |
| oVPL171    | caacaaccataaacgcttcaccagctcagggatctgctgtaaggacgctgagctcgaattcactggccgtcg                                                                       | Amplifies the backbone of pVPL3002 for Gibson assembly                                                                                              |
| oVPL172    | tcagcaccagccctgtcatgaacatgaagcccatgctgtaagtgaaatctcatggctatagctgttctctg                                                                        | Amplifies the backbone of pVPL3002 for Gibson assembly                                                                                              |
| oVPL187    | taccgagctcgaattcactgg                                                                                                                          | Rev, amplifies pVPL3002 backbone                                                                                                                    |
| oVPL188    | atcctctagagtcgacctgc                                                                                                                           | Fwd, amplifies pVPL3002 backbone                                                                                                                    |
| oVPL192    | ttatcgtcacgagccaacac                                                                                                                           | Fwd, combined with oVPL193 for screening pVPL3010 chromosomal integration and screening <i>acs1</i> deletion                                        |
| oVPL193    | tcagttggtcaccgaaacag                                                                                                                           | Rev, combined with oVPL192 for screening pVPL3010 chromosomal integration and screening <i>acs1</i> deletion                                        |
| oVPL194    | tgtgctgaaggcgattaag                                                                                                                            | Fwd, for pVPL3125 screening                                                                                                                         |
| oVPL380    | /5phos/ttcttgtaaaagctacttctcagtcac                                                                                                             | Fwd, amplifies the integration cassette of pVPL3137 from <i>L. casei</i> BFLM218                                                                    |
| oVPL381    | /5phos/atcgtgttgacaatgatcaagcc                                                                                                                 | Rev, amplifies the integration cassette of pVPL3137 from <i>L. casei</i> BFLM218                                                                    |
| oVPL382    | agtcggataataaaacttccgcaatg                                                                                                                     | Fwd, combined with oVPL383 for amplifying the backbone of pVPL3125, which can be used for Gibson assembly with insertion cassette (oVPL384-oVPL385) |
| oVPL383    | gatgctaaggccaactcgatg                                                                                                                          | Rev, combined with oVPL193 for screening pVPL3010 chromosomal integration and screening <i>acs1</i> deletion                                        |
| oVPL384    | agttaaacagtcacattggcgaaagttattatccgactgattataaggatcatgatggcgattataaggatcatgatcattataaggatgatgatgataag<br>gatgctaaggccaactcgatggcgaatgcaagccgat | Combined with oVPL385 for self-ligation to form double strand fragment (3x-FLAG tag) which can be cloned in the backbone of pVPL3125                |

| oligo name | Sequence (5'-3') <sup>†</sup>                                                                                                                    | Target/comment <sup>#</sup>                                                                                                          |
|------------|--------------------------------------------------------------------------------------------------------------------------------------------------|--------------------------------------------------------------------------------------------------------------------------------------|
| oVPL385    | atacggcttgacacatcgccatcgagttggccttagcatccttatcatcatccttataatcgatcatcatgatcctataatcgccatcatgatcctataatc<br>agtcggataataaaccttcccaatggactgttttaact | Combined with oVPL384 for self-ligation to form double strand fragment (3x-FLAG tag) which can be cloned in the backbone of pVPL3125 |
| oVPL386    | ttggcgaaagtttattatccgactgattata                                                                                                                  | Combined with oVPL387-oVPL388 to screen pVPL3137                                                                                     |
| oVPL387    | aaactaaaggatcatcactcgcaaatcag                                                                                                                    | Combined with oVPL386-oVPL388 to screen pVPL3137                                                                                     |
| oVPL388    | atcctaaggacatgttgaggacatcg                                                                                                                       | Combined with oVPL386-oVPL387 to screen pVPL3137                                                                                     |
| oVPL399    | ggctaaaatctccttgaatagtatattatag                                                                                                                  | Fwd, amplifies the backbone of pSIP411                                                                                               |
| oVPL400    | taactagactcgaggaattcggtac                                                                                                                        | Rev, amplifies the backbone of pSIP411                                                                                               |
| oVPL504    | agtttattatccgactgattataaggatc                                                                                                                    | Fwd, combined with oVPL506-oVPL507 for <i>L. casei</i> BFLM218 3x-FLAG tag insertion SCO screening                                   |
| oVPL505    | ttagcatccttatcatcatc                                                                                                                             | Rev, combine with oVPL506-oVPL507 for <i>L. casei</i> BFLM218 3x-FLAG tag insertion SCO screening                                    |
| oVPL506    | tagtgtaaccgatttccatagcc                                                                                                                          | Fwd, combined with oVPL507 and oVPL504 to screen <i>L. casei</i> BFLM218 3x-FLAG tag insertion screening                             |
| oVPL507    | ttgaccggtttactggagagcc                                                                                                                           | Rev, <i>L. casei</i> BFLM218 3x-FLAG tag insertion screening                                                                         |
| oVPL659    | tgccccgttagtgaaagaag                                                                                                                             | Fwd, amplifies the pSIP411                                                                                                           |
| oVPL660    | attctgctcccccttatg                                                                                                                               | Rev, amplifies the pSIP411                                                                                                           |
| oVPL703    | tgctgcttttggctatcaa                                                                                                                              | Rev, for pVPL3862 screening                                                                                                          |
| oVPL1335   | ggttcttgaatgatgatgca                                                                                                                             | Fwd, 5' u/s flanking region of <i>L. reuteri</i> pduCDE                                                                              |
| oVPL1336   | acaacagccgaacgatttcc                                                                                                                             | Rev, 5' u/s flanking region of <i>L. reuteri</i> pduCDE                                                                              |
| oVPL1337   | tggtgctagcgaatggag                                                                                                                               | Fwd, 3' d/s flanking region of <i>L. reuteri</i> pduCDE                                                                              |
| oVPL1338   | tacgatctgccatttcaac                                                                                                                              | Rev, 3' d/s flanking region of <i>L. reuteri</i> pduCDE                                                                              |
| oVPL1339   | agtgtaaagttgaaaatggcaagatcgttaggtcttgaatgatgatgcattgcgtcc                                                                                        | LCR bridging oligo for pORI- <i>ddIF258Y::pduCDE</i> deletion cassette                                                               |
| oVPL1340   | aaacgacggccagtgaaatcgagctggatgggtgtagcgaatggagataaccattgg                                                                                        | LCR bridging oligo for pORI- <i>ddIF258Y::pduCDE</i> deletion cassette                                                               |
| oVPL1341   | agcgcctattggaaatcgttggctgtgtatcctctagagtcgacctgagcatgcaa                                                                                         | LCR bridging oligo for pORI- <i>ddIF258Y::pduCDE</i> deletion cassette                                                               |
| oVPL1342   | agttgatgccggagtacaag                                                                                                                             | Fwd, u/s SCO screening of pVPL3478 chromosomal integration                                                                           |
| oVPL1343   | tgccgtggctcattgattc                                                                                                                              | Also for DCO screening of $\Delta$ <i>pduCDE</i> in <i>L. reuteri</i> 6475                                                           |
| oVPL1344   | acattggtccagactcaccag                                                                                                                            | Rev, u/s SCO screening of pVPL3478 chromosomal integration                                                                           |
| oVPL1345   | atggctggagctgaagtagg                                                                                                                             | Fwd, d/s SCO screening of pVPL3478 chromosomal integration                                                                           |
| oVPL1562   | atatagtagttacgtaactcaccg                                                                                                                         | Rev, d/s SCO screening of pVPL3478 chromosomal integration                                                                           |
| oVPL1563   | tggtagattttgaacgagcattacc                                                                                                                        | Also for DCO screening of $\Delta$ <i>sdpA</i> in <i>L. reuteri</i> DSM 17938                                                        |
| oVPL1754   | atccttgccgatgaatttcgattg                                                                                                                         | Fwd, for screening of $\Delta$ <i>sdpA</i> in <i>L. reuteri</i> DSM 17938                                                            |
| oVPL1755   | caagaaatgaaagatgcttatgagc                                                                                                                        | Fwd, 5' u/s flanking region of <i>L. reuteri</i> R2lc <i>araT</i>                                                                    |
| oVPL1756   | agtagctggcatgataaattcctc                                                                                                                         | Rev, 5' u/s flanking region of <i>L. reuteri</i> R2lc <i>araT</i>                                                                    |
| oVPL1757   | tgccacaatctcatttgaggaatg                                                                                                                         | Fwd, 3' d/s flanking region of <i>L. reuteri</i> R2lc <i>araT</i>                                                                    |
| oVPL1762   | aactggacaattccatcgaggtc                                                                                                                          | Rev, 3' d/s flanking region of <i>L. reuteri</i> R2lc <i>araT</i>                                                                    |
| oVPL1763   | aaatggattcattgggtttgagcc                                                                                                                         | Fwd, for screening of $\Delta$ <i>araT</i> in <i>L. reuteri</i> R2lc                                                                 |
| oVPL1758   | aacgacggccagtgaaatcgagctcggaatcctgcccgtatgaattcgattgactgt                                                                                        | Rev, for screening of $\Delta$ <i>araT</i> in <i>L. reuteri</i> R2lc                                                                 |
| oVPL1759   | tcgttgctcataagcatcttcttcttgtagtagctggcatgataaattcctctatat                                                                                        | LCR bridging oligo for pORI- <i>ddIF258Y::araT</i> deletion cassette                                                                 |
| oVPL1760   | aagagcattacctcaaatgagattgtggcaatcctctagagctgacctgcaggcatgcaa                                                                                     | LCR bridging oligo for pORI- <i>ddIF258Y::araT</i> deletion cassette                                                                 |

| oligo name | sequence (5'-3') <sup>†</sup>                               | Target/comment <sup>#</sup>                                                                          |
|------------|-------------------------------------------------------------|------------------------------------------------------------------------------------------------------|
| oVPL1555   | agtcataaagccaacccaaaagg                                     | Fwd, 5' u/s flanking region of <i>L. reuteri</i> DSM 17938 <i>sdpA</i>                               |
| oVPL1556   | tgcttaaatgttaaaatgaaatagac                                  | Rev, 5' u/s flanking region of <i>L. reuteri</i> DSM 17938 <i>sdpA</i>                               |
| oVPL1557   | tgcataaaaaactcctctataatatac                                 | Fwd, 3' u/s flanking region of <i>L. reuteri</i> DSM 17938 <i>sdpA</i>                               |
| oVPL1558   | tcataccggcctgatcgg                                          | Rev, 3' u/s flanking region of <i>L. reuteri</i> DSM 17938 <i>sdpA</i>                               |
| oVPL1559   | aaacgacggccagtgaaatcgagctcggaagtcataaagccaacccaaaaggaattat  | LCR bridging oligo for pORI- <i>ddlF258Y::sdpA</i> deletion cassette                                 |
| oVPL1560   | agtcatttcattttaaacgattaagcatgcataaaaaactcctctataatatacaat   | LCR bridging oligo for pORI- <i>ddlF258Y::sdpA</i> deletion cassette                                 |
| oVPL1561   | gtaatatgcgaaccgatcaggccggatgaatcctctagagtcgacctgcaggcatgcaa | LCR bridging oligo for pORI- <i>ddlF258Y::sdpA</i> deletion cassette                                 |
| oVPL2065   | aaaaacaactaacaattatctaacagtaacc                             | Fwd, 5' u/s flanking region of <i>L. reuteri</i> DSM 17938 <i>sdpB</i>                               |
| oVPL2066   | gaagactaattctagacaagtg                                      | Rev, 5' u/s flanking region of <i>L. reuteri</i> DSM 17938 <i>sdpB</i>                               |
| oVPL2067   | taacgttggaattccttattcattcc                                  | Fwd, 3' u/s flanking region of <i>L. reuteri</i> DSM 17938 <i>sdpB</i>                               |
| oVPL2068   | ttcatgtcatcgtaaatcaagg                                      | Rev, 3' u/s flanking region of <i>L. reuteri</i> DSM 17938 <i>sdpB</i>                               |
| oVPL2069   | aaacgacggccagtgaaatcgagctcggaaaaaacaactaacaattatctaacagtaac | LCR bridging oligo for pORI- <i>ddlF258Y::sdpB</i> deletion cassette                                 |
| oVPL2070   | taactattcactgtctagaattagcttctaacglttggaattccttattcattcctc   | LCR bridging oligo for pORI- <i>ddlF258Y::sdpB</i> deletion cassette                                 |
| oVPL2071   | cgagttccttgaattacgcatgacatgaaatcctctagagtcgacctgcaggcatgcaa | LCR bridging oligo for pORI- <i>ddlF258Y::sdpB</i> deletion cassette                                 |
| oVPL2072   | aaccaccaatcccaagctatg                                       | Fwd, for screening of $\Delta$ <i>sdpB</i> in <i>L. reuteri</i> DSM 17938                            |
| oVPL2073   | tgcttatcaacaagtagattgcc                                     | Rev, for screening of $\Delta$ <i>sdpB</i> in <i>L. reuteri</i> DSM 17938                            |
| oVPL2589   | ctatcagttgccatcgatggcgacg                                   | Fwd, amplifies promoter region of <i>L. plantarum</i> BAA-793 <i>Ddl</i>                             |
| oVPL2590   | ttattccgcgtctaacgcaacgaaa                                   | Rev, amplifies <i>L. plantarum</i> BAA-793 <i>Ddl</i>                                                |
| oVPL2591   | aaaataaataaggagcactcaccatgctatcagttgcatcgatggcgacgcagg      | Bridging oligo for <i>L. plantarum</i> BAA-793 <i>Ddl</i> and pNZ8048 backbone.                      |
| oVPL2592   | tatgatttcgttcggttagacgccaataatagttctagagctcaagcttctttgaa    | Bridging oligo for <i>L. plantarum</i> BAA-793 <i>Ddl</i> and pNZ8048 backbone.                      |
| oVPL2593   | /5phos/tcacaccactcgcacccagctacttattatagctagaacg             | Rev, modifies F260Y of <i>ddl</i> of <i>L. plantarum</i> BAA-793                                     |
| oVPL2594   | /5phos/cgttcgaattaccagtcgaattacc                            | Fwd, amplifies the <i>ddl</i> of <i>L. plantarum</i> BAA-793                                         |
| oVPL2694   | taatcgttgtagctctcagcccca                                    | Combined with oVPL2072-oVPL2073 for screening of $\Delta$ <i>sdpB</i> in <i>L. reuteri</i> DSM 17938 |
| oVPL2841   | aaacgacgatgcaatcacag                                        | Fwd, amplifies GAPDH gene of <i>L. salivarius</i> CCUG 47825. For qPCR.                              |
| oVPL2842   | cagcaccagttgagtgagga                                        | Rev, amplifies GAPDH gene of <i>L. salivarius</i> CCUG 47825. For qPCR.                              |
| oVPL2845   | cctgctcgtaaggctctc                                          | Fwd, amplifies native <i>ddl</i> of <i>L. salivarius</i> CCUG 47825. For qPCR.                       |
| oVPL2846   | acggattgcacctaacttg                                         | Rev, amplifies native <i>ddl</i> of <i>L. salivarius</i> CCUG 47825. For qPCR.                       |
| oVPL2849   | tggaatgctcgaatcttaggc                                       | Fwd, amplifies <i>ddlF260Y</i> of pVPL3933. For qPCR.                                                |
| oVPL2850   | aaacgcgctgacgacatct                                         | Rev, amplifies <i>ddlF260Y</i> of pVPL3933. For qPCR.                                                |

oVPL: Van Pijkeren Lab oligonucleotide identification number.

<sup>†</sup>: /5phos/: indicates oligonucleotides is phosphorylated on 5'-end;

<sup>#</sup>: LCR: ligase cycling reaction (8). Fwd: forward; Rev: reverse; GAPDH: glyceraldehyde-3-phosphate dehydrogenase (YP\_536057.1). *pduCDE*: glycerol dehydratase large subunit PduC, glycerol dehydratase medium subunit PduD, glycerol dehydratase small subunit PduE (BAG26151, BAG26150.1, BAG26149.1); *araT*: aromatic amino acid aminotransferase (MG822655); *sdpA*: bifunctional phosphodiesterase (WP\_003672341.1); *sdpB*: hypothetical protein and LPXTG-motif cell wall anchor domain protein (WP\_013923860.1 , AEI56985.1); *acs1*: acyl-CoA synthetase (WP\_014570113.1); The accession number listed can be found on <https://www.ncbi.nlm.nih.gov>.

## References

1. Leenhouts K, Buist G, Bolhuis A, ten Berge A, Kiel J, Mierau I, Dabrowska M, Venema G, Kok J. 1996. A general system for generating unlabelled gene replacements in bacterial chromosomes. *Mol Gen Genet* 253:217-24.
2. Molin G, Andersson R, Ahrne S, Lonner C, Marklinder I, Johansson ML, Jeppsson B, Bengmark S. 1992. Effect of fermented oatmeal soup on the cholesterol level and the *Lactobacillus* colonization of rat intestinal mucosa. *Antonie Van Leeuwenhoek* 61:167-73.
3. Rosander A, Connolly E, Roos S. 2008. Removal of antibiotic resistance gene-carrying plasmids from *Lactobacillus reuteri* ATCC 55730 and characterization of the resulting daughter strain, *L. reuteri* DSM 17938. *Appl Environ Microbiol* 74:6032-40.
4. von Schillde MA, Hormannsperger G, Weiher M, Alpert CA, Hahne H, Bauerl C, van Huynegem K, Steidler L, Hrnrcir T, Perez-Martinez G, Kuster B, Haller D. 2012. Lactocepin secreted by *Lactobacillus* exerts anti-inflammatory effects by selectively degrading proinflammatory chemokines. *Cell Host Microbe* 11:387-96.
5. Kuipers OP, de Ruyter PGGA, Kleerebezem M, de Vos WM. 1998. Quorum sensing-controlled gene expression in lactic acid bacteria. *Journal of Biotechnology* 64:15-21.
6. Law J, Buist G, Haandrikman A, Kok J, Venema G, Leenhouts K. 1995. A System to Generate Chromosomal Mutations in *Lactococcus-Lactis* Which Allows Fast Analysis of Targeted Genes. *Journal of Bacteriology* 177:7011-7018.
7. Sorvig E, Mathiesen G, Naterstad K, Eijsink VG, Axelsson L. 2005. High-level, inducible gene expression in *Lactobacillus sakei* and *Lactobacillus plantarum* using versatile expression vectors. *Microbiology* 151:2439-49.
8. de Kok S, Stanton LH, Slaby T, Durot M, Holmes VF, Patel KG, Platt D, Shapland EB, Serber Z, Dean J, Newman JD, Chandran SS. 2014. Rapid and reliable DNA assembly via ligase cycling reaction. *ACS Synth Biol* 3:97-106.
